# Supplementary material for: Vicarious reward unblocks associative learning about novel cues in male rats
Source: eLife. 2020 Oct 1;9:e60755. doi: 10.7554/eLife.60755 (PMC7529453; doi:10.7554/eLife.60755)
Supplement: Figure 3—source data 1. [file elife-60755-fig3-data1.xlsx]

## Sheet: Figure 3 Source Data 1
	Figure 3 - Source Data 1. Probing vicarious associative learning
	Experimental	F value	P value	ηp2
	group	(main effect)
	RMA -- WS; aCS+,aCS-, pCS+, pCS-, bin 1- 5
		(3, 57) = 83.180	< 0.001	ηp2 = 0.814
	Post hoc comparisons for main effect	Mean difference	Std error	P value	Cohen’s D (confidence level = 0.95)
	aCS+ | aCS-	37.406	2.964	< 0.001	2.23
	pCS+ | aCS-	14.544	2.257	< 0.001	0.88
	pCS+ | pCS-	10.804	2.592	0.003	0.6
	pCS- | aCS-	3.74	1.19	0.39	0.25
	Control	F value	P value	ηp2
	Group 1	(main effect)
	RM anova	F (1.372, 20.585) = 31.215	< 0.001	0.675
	RMA -- WS; aCS+,aCS-, pCS+, pCS-, bin 1- 5)
	Post hoc comparisons for main effect	Mean difference	Std error	P value	Cohen’s D
	aCS+ | aCS-	32.043	2.958	0.021	1.91
	pCS+ | aCS-	7.948	1.862	0.004	0.75
	pCS+ | pCS-	3.687	2.146	0.637	0.3
	pCS- | aCS-	4.26	1.634	0.119	0.44
	Control	F value	P value	ηp2
	Group 2	(main effect)
	RMA -- WS; aCS+,aCS-, pCS+, pCS-, bin 1- 5)	(F (1.732, 25.980) = 46.215	< 0.001	0.755
	Post hoc comparisons for main effect	Mean difference	Std error	P value	Cohen’s D
	aCS+ | aCS-	30.162	3.754	< 0.001	1.76
	pCS+ | aCS-	0.318	2.294	1	0.04
	pCS+ | pCS-	0.513	2.662	1	0.02
	pCS- | aCS-	-0.195	2.1	1	-0.01
	Experimental vs Control 1 & 2	F value	P value	ηp2
	Group comparison	(interaction effect, 10 seconds / 30 seconds period after cue onset )	(10 seconds / 30 seconds period after cue onset )	(10 seconds / 30 seconds period after cue onset )
	Mixed–RMA -- WS; aCS+,aCS-, pCS+, pCS-; trial 1 - 6 & BS; Experimental vs control 1 & 2	F(4.300, 05.354) = 3.713 /	0.002 / 0.031	0.132 / 0.101
		F(4.140, 101.422) = 2.748
	Post hoc comparisons for interaction effect	Mean difference	Std error	P value
	Experimental group	10 seconds/ 30 seconds
	aCS+ | aCS-	44.10 / 54.727	4.242 / 3.760	< 0.001 / < 0.001
	pCS+ | pCS-	15.753 / 10.711	3.021 / 2.319	< 0.001 / < 0.001
	Control group 1
	aCS+ | aCS-	32.851 / 46.504	5.556 / 4.204	< 0.001 / < 0.001
	pCS+ | pCS-	2.850 / 2.433	3.377 / 2.593	1.00 / 1.00
	Control group 2
	aCS+ | aCS-	34.700 / 47.969	5.556 / 4.204	< 0.001 / < 0.001
	pCS+ | pCS-	1.233 / -0.782	4.743 / 2.593	1.00 / 1.00
