# Supplementary material for: Vicarious reward unblocks associative learning about novel cues in male rats
Source: eLife. 2020 Oct 1;9:e60755. doi: 10.7554/eLife.60755 (PMC7529453; doi:10.7554/eLife.60755)
Supplement: Figure 4—source data 1. [file elife-60755-fig4-data1.xlsx]

## Sheet: Sheet1
		Figure 4 - Source Data 1. Strength of the social unblocking effect over trials
	Experimental vs Control 1 & 2 - Difference scores
	(Mixed–RMA -- WS; aCS+/aCS-, pCS+/pCS-, pCS+/aCS- and pCS-/aCS- contrasts, trial 1 – 6; BS; Experimental vs control 1)	F value, P value, ηp2	Experimental – control 1: Mean difference, std error, p-value	Experimental – control 2: Mean difference, std error, p-value	Control 1- Control 2:
		(Between subjects effect)			Mean difference, std error, p-value
	10 seconds period after cue onset
	aCS+/aCS-	F(2, 49) = 1.859, 0.167, 0.071	11.242, 6.363, 0.251	9.400 , 6.363, 0.438	-1.842, 6.707, 1.00
	pCS+/aCS-	F(2, 49) = 6.397, 0.003, 0.207	12.903, 4.531, 0.019	14.520, 4.531, 0.007	1.617, 4.776, 1.00
	pCS+/pCS-	F(2, 49) = 15.554, < 0.001, 0.388	13.250, 3.908, 0.004	21.392, 3.908, 0.001	8.142, 4.119, 0.161
	pCS-/aCS-	F(2, 49) = 2.429, 0.099, 0.090	0.4347, 3.406, 1.00	6.872, 3.406, 1.00	6.525, 3.590, 0.226
	30 seconds period after cue onset
	aCS+/aCS-	F(2, 49) = 1.251, 0.295, 0.049	8.223, 5.640, 0.454	6.757, 5.640, 0.710	-1.465, 5.945, 1.00
	pCS+/aCS-	F(2, 49) = 5.976, 0.005, 0.196	8.278, 3.478, 0.064	11.493, 3.478, 0.005	3.215, 3.667, 1.00
	pCS+/pCS-	F(2, 49) = 12.881, < 0.001, 0.345	9.654, 3.388, 0.021	17.054, 3.388, < 0.001	7.490, 3,572, 0.123
	pCS-/aCS-	F(2, 49) = 1.467, 0.241	1.286, 3.337, 1.00	5.561, 3,337, 0.306	4.275, 3.518, 0.690
